# Supplementary material for: Molecular basis of F-actin regulation and sarcomere assembly via myotilin
Source: PubMed Central journal article supplement (PMC8062120; doi:10.1371/journal.pbio.3001148), 2021-04-12
Supplement: pbio.3001148.s005.pdf [file pbio.3001148.s005.pdf]

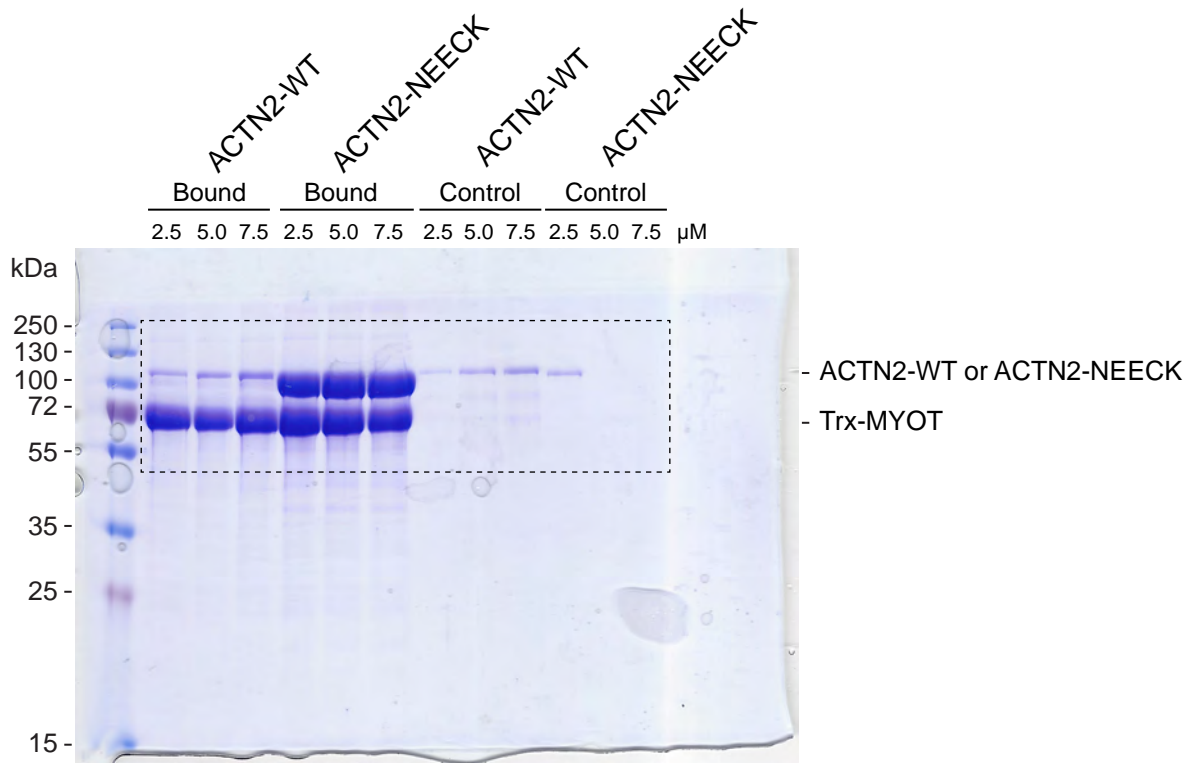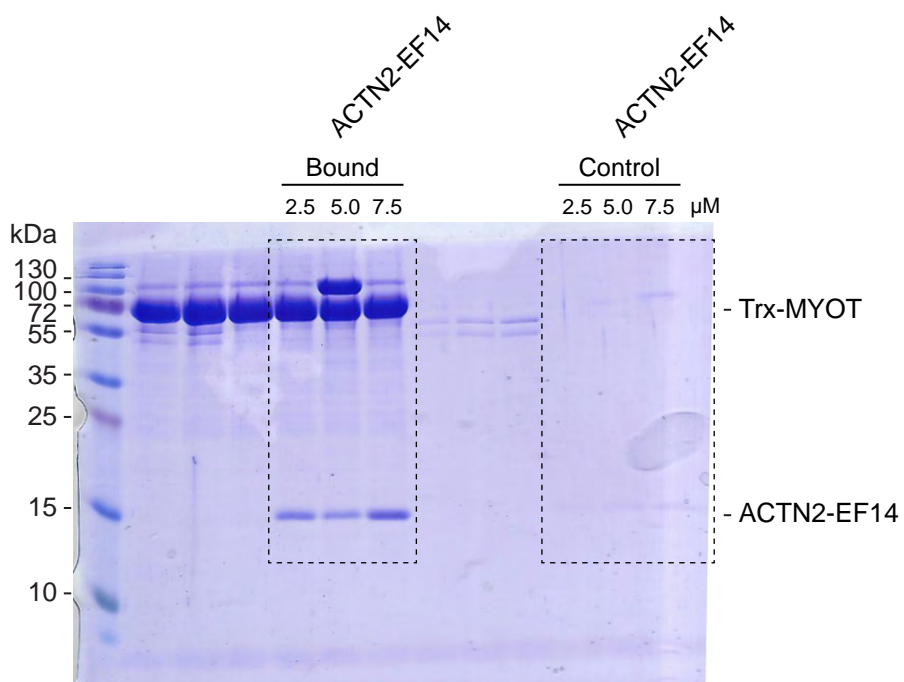

Fig 4F

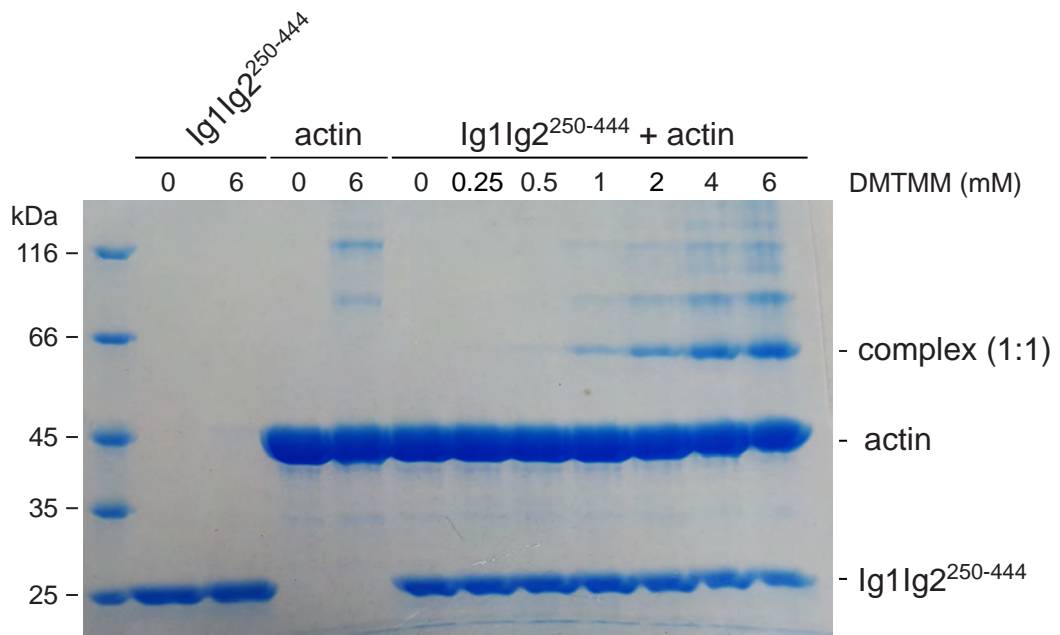

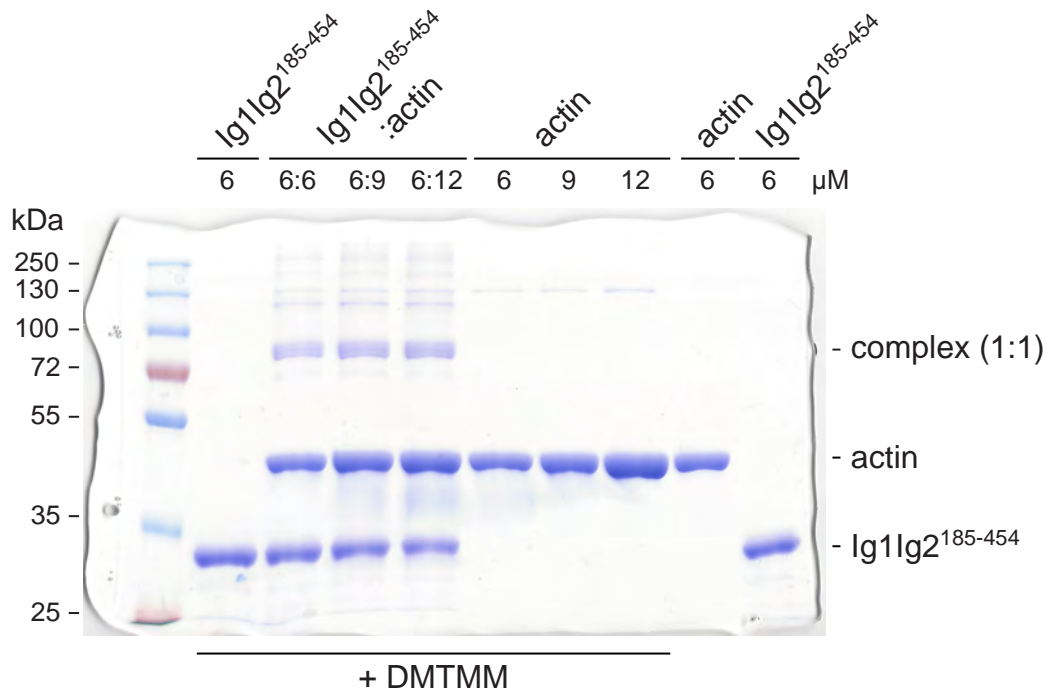

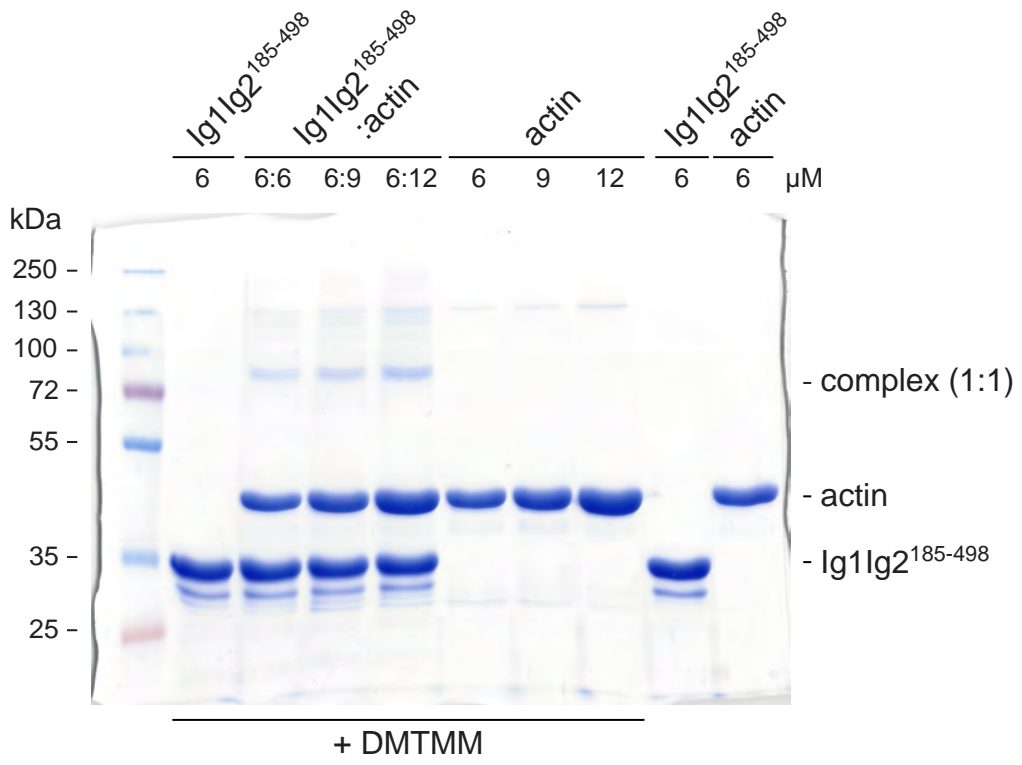

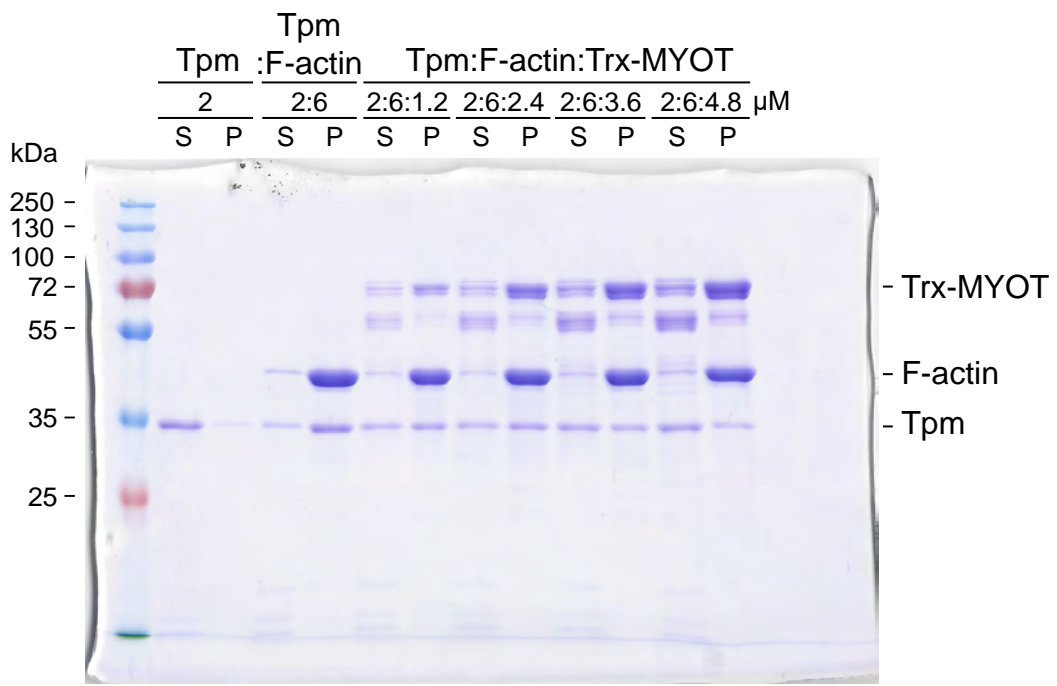

S4A Fig

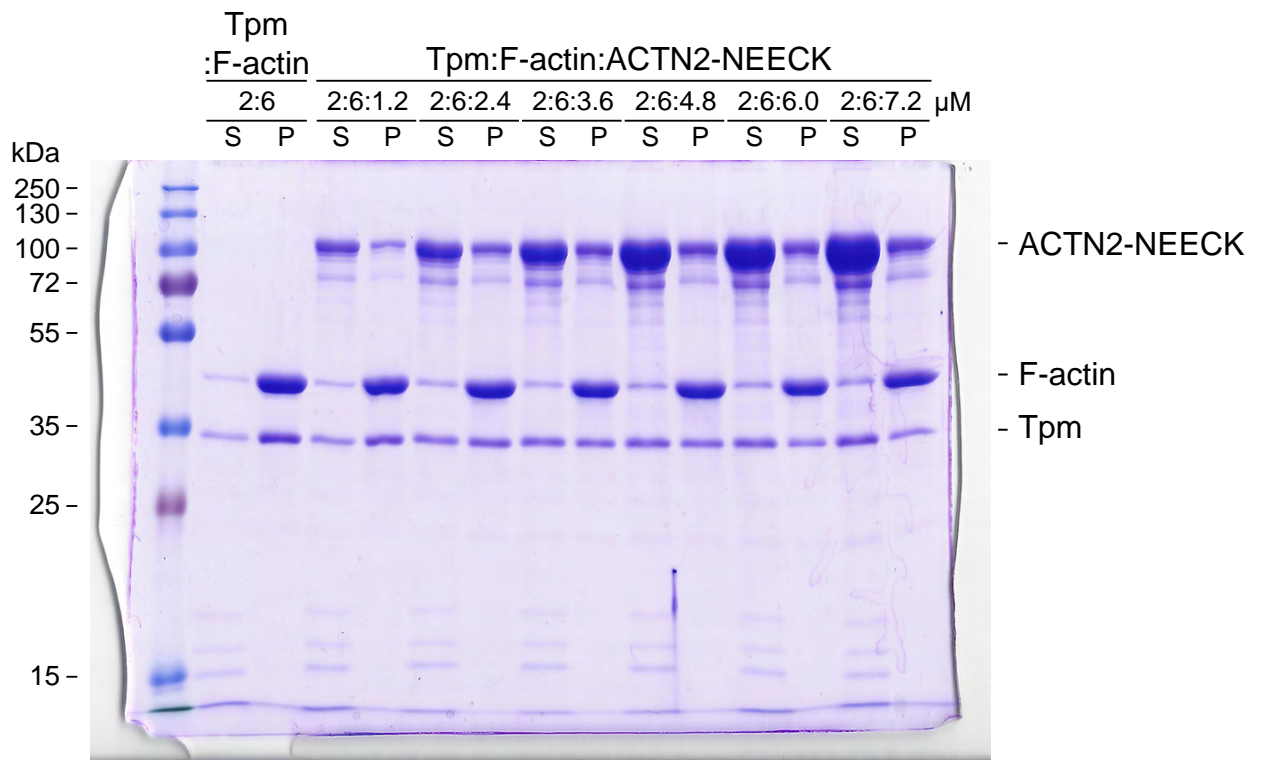

S4B Fig

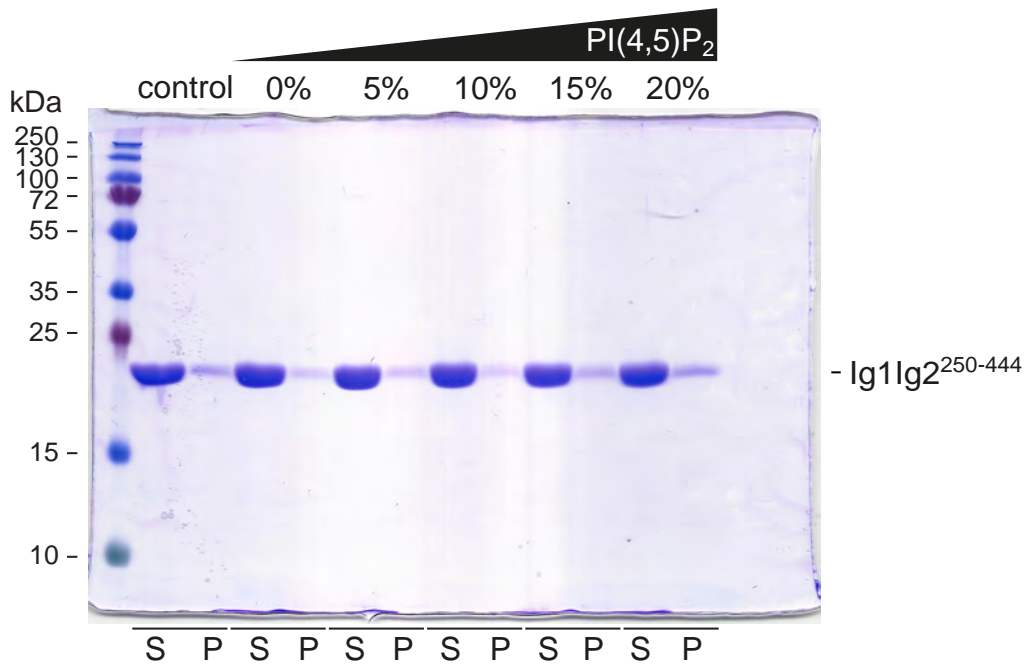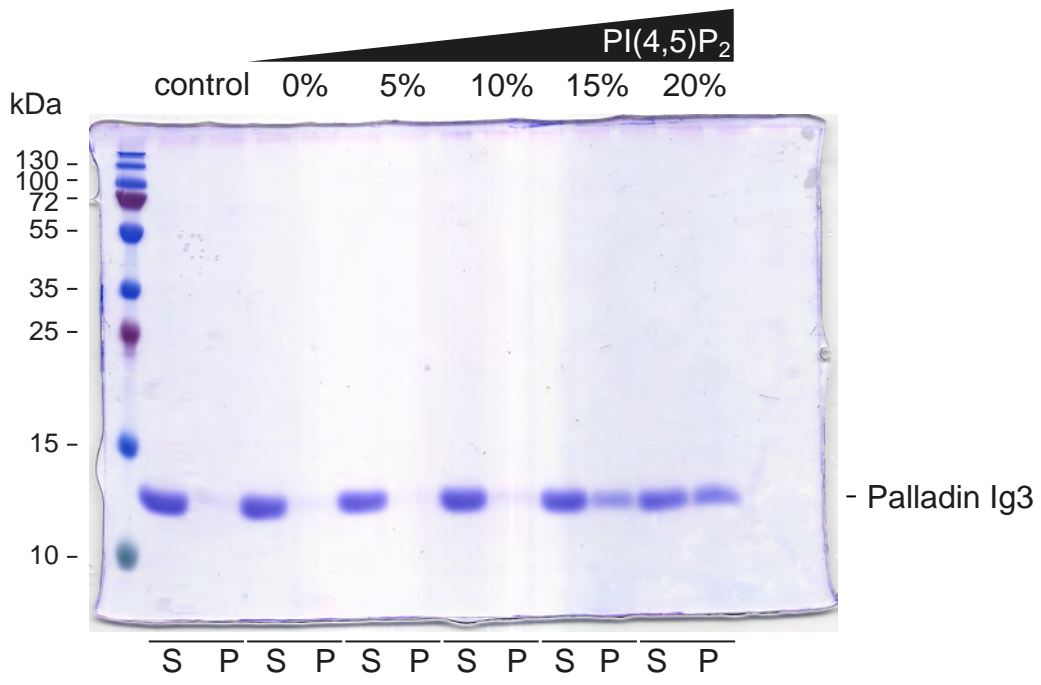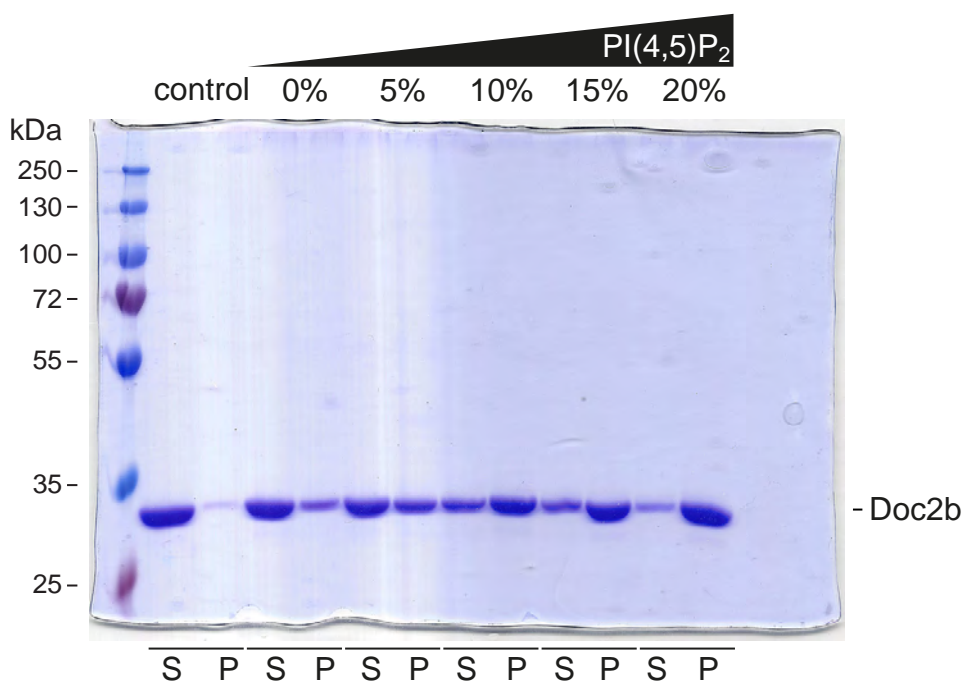

S4D Fig
