# Supplementary material for: Molecular basis of F-actin regulation and sarcomere assembly via myotilin
Source: PubMed Central journal article supplement (PMC8062120; doi:10.1371/journal.pbio.3001148), 2021-04-12
Supplement: pbio.3001148.s007.pdf [file pbio.3001148.s007.pdf]

**S1 Table. SAXS data collection, analysis and derived structural parameters**

| Construct                                               | Ig1Ig2 <sup>250-444*</sup>                              | Ig1Ig2 <sup>250-498</sup>        | Ig1Ig2 <sup>220-452</sup>                          | Trx-MYOT                                                      | Ig1Ig2 <sup>220-452†</sup>                                                             | Ig1Ig2 <sup>220-452 R405K</sup>                                                        |
|---------------------------------------------------------|---------------------------------------------------------|----------------------------------|----------------------------------------------------|---------------------------------------------------------------|----------------------------------------------------------------------------------------|----------------------------------------------------------------------------------------|
| <b>Data collection parameters</b>                       |                                                         |                                  |                                                    |                                                               |                                                                                        |                                                                                        |
| Radiation source                                        | ESRF (Grenoble, France)                                 |                                  |                                                    | DESY (Hamburg, Germany)                                       |                                                                                        |                                                                                        |
|                                                         |                                                         |                                  | Doris                                              |                                                               | Petra III                                                                              |                                                                                        |
| Beamline                                                | BM29 BioSAXS                                            |                                  | EMBL X33                                           |                                                               | EMBL P12                                                                               |                                                                                        |
| Detector                                                | Pilatus 1M                                              |                                  | Pilatus 1M-W                                       | Pilatus 2M                                                    | Pilatus 6M                                                                             |                                                                                        |
| Beam geometry [mm, FWHM]                                | 0.10 × 0.20                                             |                                  | n.d.                                               | 0.12 × 0.20                                                   | 0.12 × 0.20                                                                            |                                                                                        |
| Wavelength [nm]                                         | 0.099                                                   |                                  | 0.126                                              | 0.124                                                         | 0.124                                                                                  |                                                                                        |
| Sample–detector distance [m]                            | 2.867                                                   |                                  | 2.7                                                | 3.1                                                           | 3.0                                                                                    |                                                                                        |
| Momentum of transfer <i>s</i> range [nm <sup>-1</sup> ] | 0.04–4.0                                                |                                  | 0.1–6.0                                            | 0.08–3.5                                                      | 0.15–7.3                                                                               |                                                                                        |
| Exposure time [s]                                       | 15                                                      |                                  | 15                                                 | 1 (SEC-SAXS)                                                  | 0.145                                                                                  |                                                                                        |
| Temperature [°C]                                        | 20                                                      |                                  | 11                                                 | 20                                                            | 20                                                                                     |                                                                                        |
| Buffer                                                  | 20 mM HEPES, 150 mM NaCl, 5% glycerol, 1 mM DTT, pH 7.4 |                                  | 20 mM MES, 200 mM NaCl, 3% glycerol, pH 6.0        | 20 mM Tris, 400 mM NaCl, 250 mM arginine, 5% glycerol, pH 7.5 | 20 mM HEPES, 150 mM NaCl, 5% glycerol, 1 mM DTT, pH 7.4                                |                                                                                        |
| <b>Overall parameters</b>                               |                                                         |                                  |                                                    |                                                               |                                                                                        |                                                                                        |
| Conc. range measured <sup>§</sup>                       | 1–14.12 mg/ml (0.05–0.64 mM)                            | 1–42.8 mg/ml (0.04–1.53 mM)      | 1–52 mg/ml (0.04–1.96 mM)                          | n.a.                                                          | 2.1–36.6 mg/ml (0.08–1.38 mM)                                                          | 2.3–45.5 mg/ml (0.09–1.72 mM)                                                          |
| R <sub>g</sub> (Guinier) [Å]                            | 28 (0.64 mM)                                            | 32 (0.54 mM)<br>37 (1.53 mM)     | 31 (0.04 mM)<br>37 (0.79 mM)<br>39 (1.96 mM)       | 51                                                            | 30 (0.08 mM)<br>33 (0.19 mM)<br>33 (0.37 mM)<br>34 (0.69 mM)<br>36 (1.38 mM)           | 33 (0.09 mM)<br>34 (0.27 mM)<br>34 (0.47 mM)<br>35 (0.82 mM)<br>36 (1.72 mM)           |
| R <sub>g</sub> from PDDF [Å]                            | 29 (0.64 mM)                                            | 34 (0.54 mM)<br>38 (1.53 mM)     | 32 (0.04 mM)<br>39 (0.79 mM)<br>41 (1.96 mM)       | 53                                                            | 33 (0.08 mM)<br>34 (0.19 mM)<br>35 (0.37 mM)<br>37 (0.69 mM)<br>37 (1.38 mM)           | 34 (0.09 mM)<br>36 (0.27 mM)<br>36 (0.47 mM)<br>37 (0.82 mM)<br>38 (1.72 mM)           |
| D <sub>max</sub> [Å]                                    | 101 (0.64 mM)                                           | 140 (0.54 mM)<br>152 (1.53 mM)   | 107 (0.04 mM)<br>151 (0.79 mM)<br>152 (1.96 mM)    | 200                                                           | 115 (0.08 mM)<br>125 (0.19 mM)<br>130 (0.37 mM)<br>140 (0.69 mM)<br>140 (1.38 mM)      | 120 (0.09 mM)<br>130 (0.27 mM)<br>140 (0.47 mM)<br>140 (0.82 mM)<br>140 (1.72 mM)      |
| Molecular mass (RALLS) [kDa]                            | n.a.                                                    | n.a.                             | n.a.                                               | 70                                                            | n.a.                                                                                   | n.a.                                                                                   |
| Molecular mass (DATMOV) [kDa]                           | 24.3 (0.64 mM)                                          | 31.2 (0.54 mM)<br>44.7 (1.53 mM) | 27.3 (0.04 mM)<br>44.7 (0.79 mM)<br>58.1 (1.96 mM) | 63.7                                                          | 30.8 (0.08 mM)<br>30.7 (0.19 mM)<br>33.7 (0.37 mM)<br>37.8 (0.69 mM)<br>43.2 (1.38 mM) | 29.1 (0.09 mM)<br>31.9 (0.27 mM)<br>35.6 (0.47 mM)<br>40.6 (0.82 mM)<br>45.7 (1.72 mM) |

*(continued)*

(continued)

| Construct                                                | Ig1Ig2 <sup>250-444*</sup>   | Ig1Ig2 <sup>250-498</sup> | Ig1Ig2 <sup>220-452</sup> | Trx-MYOT         | Ig1Ig2 <sup>220-452†</sup>   | Ig1Ig2 <sup>220-452 R405K</sup> |
|----------------------------------------------------------|------------------------------|---------------------------|---------------------------|------------------|------------------------------|---------------------------------|
| Molecular mass from Porod                                | 21.4 (0.64 mM)               | 26.4 (0.54 mM)            | 27.5 (0.04 mM)            | 77.3             | 26.9 (0.08 mM)               | 24.5 (0.09 mM)                  |
| volume [kDa]                                             |                              | 37.9 (1.53 mM)            | 36.7 (0.79 mM)            |                  | 25.9 (0.19 mM)               | 26.3 (0.27 mM)                  |
|                                                          |                              |                           | 48.2 (1.96 mM)            |                  | 28.3 (0.37 mM)               | 29.6 (0.47 mM)                  |
|                                                          |                              |                           |                           |                  | 30.9 (0.69 mM)               | 33.6 (0.82 mM)                  |
|                                                          |                              |                           |                           |                  | 36.2 (1.38 mM)               | 38.2 (1.72 mM)                  |
| Molecular mass (monomer sequence) [kDa] <sup>&amp;</sup> | 21.9                         | 28.0                      | 26.5                      | 69.7             | 26.5                         | 26.5                            |
| <b>Software employed</b>                                 |                              |                           |                           |                  |                              |                                 |
| Primary data red.                                        | SaxsAnalysis pipeline system |                           |                           | SASFLOW          | SaxsAnalysis pipeline system |                                 |
| Data processing                                          | PRIMUS                       |                           |                           | PRIMUS / Cromixs | PRIMUS                       |                                 |
| Calculation and comparison of scattering data            | Crysol / Oligomer            |                           |                           |                  | n.a.                         |                                 |
| <i>Ab initio</i> modelling                               | DAMMIF                       |                           |                           |                  | n.a.                         |                                 |
| Addition of missing residues                             | CORAL                        |                           |                           |                  | n.a.                         |                                 |
| Ensemble modelling                                       | EOM                          |                           |                           |                  | n.a.                         |                                 |
| SASDB accession code                                     | SASDF38                      | SASDF48                   | SASDF28                   | SASDFZ7          | SASDJH8                      | SASDJJ8                         |

<sup>\*</sup>, the data for Ig1Ig2<sup>250-444</sup> were already measured and described previously [23]

<sup>§</sup>, for Ig1Ig2<sup>250-498</sup> and Ig1Ig2<sup>220-452</sup> structural parameters at various concentrations, relevant for the comparison, were calculated separately

<sup>&</sup>, Molecular mass (monomer sequence) denotes molecular mass calculated from the amino acid sequence of the monomeric species

<sup>†</sup>, measured at the same experimental settings/conditions as Ig1Ig2<sup>220-452 R405K</sup>
