# Supplementary material for: Molecular basis of F-actin regulation and sarcomere assembly via myotilin
Source: PubMed Central journal article supplement (PMC8062120; doi:10.1371/journal.pbio.3001148), 2021-04-12
Supplement: pbio.3001148.s008.pdf [file pbio.3001148.s008.pdf]

**S2 Table. List of major cross-links found between myotilin and F-actin**

| Myotilin constructs used |              | (A)        | (B)           | (C)             |                              |                    |  |
|--------------------------|--------------|------------|---------------|-----------------|------------------------------|--------------------|--|
| From Protein             | From Residue | To Protein | To Residue    | Myotilin region | Myotilin fragment identified | Score              |  |
| myotilin                 | <b>K 474</b> | actin      | <b>E 102</b>  | C-ter.          | C                            | 212.6              |  |
| myotilin                 | <b>K 462</b> | actin      | <b>D 27</b>   | C-ter.          | C                            | 199.5              |  |
| myotilin                 | <b>K 411</b> | actin      | <b>D 27*</b>  | Ig2             | A, B                         | A) 157.5, B) 175.5 |  |
| myotilin                 | <b>K 469</b> | actin      | <b>E 102</b>  | C-ter.          | C                            | 169.4              |  |
| myotilin                 | <b>D 236</b> | actin      | <b>K 330</b>  | N-ter.          | B, C                         | B) 138.4, C) 76.2  |  |
| myotilin                 | <b>D 236</b> | actin      | <b>K 328*</b> | N-ter.          | B                            | 134.9              |  |
| myotilin                 | <b>K 246</b> | actin      | <b>E 336</b>  | N-ter.          | B, C                         | B) 105.9, C) 111.2 |  |
| myotilin                 | <b>E 245</b> | actin      | <b>K 330</b>  | N-ter.          | B                            | 107.1              |  |
| myotilin                 | <b>K 246</b> | actin      | <b>D 26</b>   | N-ter.          | C                            | 106.3              |  |
| myotilin                 | <b>K 452</b> | actin      | <b>D 27*</b>  | C-ter.          | C                            | 103.9              |  |
| myotilin                 | <b>D 241</b> | actin      | <b>K 330*</b> | N-ter.          | B                            | 102.4              |  |
| myotilin                 | <b>K 469</b> | actin      | <b>D 26*</b>  | C-ter.          | C                            | 102.0              |  |
| myotilin                 | <b>K 452</b> | actin      | <b>D 26</b>   | C-ter.          | C                            | 100.9              |  |
| myotilin                 | <b>D 239</b> | actin      | <b>K 330*</b> | N-ter.          | B                            | 97.0               |  |
| myotilin                 | <b>D 239</b> | actin      | <b>K 328</b>  | N-ter.          | B                            | 88.1               |  |
| myotilin                 | <b>K 474</b> | actin      | <b>D 27</b>   | C-ter.          | C                            | 84.6               |  |
| myotilin                 | <b>K 474</b> | actin      | <b>E 336*</b> | C-ter.          | C                            | 82.7               |  |
| myotilin                 | <b>D 241</b> | actin      | <b>K 328*</b> | N-ter.          | B                            | 78.2               |  |
| myotilin                 | <b>K 462</b> | actin      | <b>D 26*</b>  | C-ter.          | C                            | 77.7               |  |
| myotilin                 | <b>K 354</b> | actin      | <b>D 27*</b>  | Ig2             | C                            | 76.7               |  |
| myotilin                 | <b>K 246</b> | actin      | <b>D 27*</b>  | N-ter.          | B, C                         | B) 54.5, C) 73.9   |  |
| myotilin                 | <b>K 415</b> | actin      | <b>D 27</b>   | Ig2             | A, B                         | A) 66.1, B) 57.6   |  |
| myotilin                 | <b>K 303</b> | actin      | <b>D 27*</b>  | Ig1             | A                            | 65.9               |  |
| myotilin                 | <b>K 367</b> | actin      | <b>D 365</b>  | Ig2             | B                            | 63.6               |  |
| myotilin                 | <b>K 367</b> | actin      | <b>E 366</b>  | Ig2             | B                            | 60.2               |  |
| myotilin                 | <b>K 452</b> | actin      | <b>E 363</b>  | C-ter.          | C                            | 48.2               |  |
| myotilin                 | <b>K 411</b> | actin      | <b>D 26</b>   | Ig2             | A                            | 47.8               |  |
| myotilin                 | <b>K 474</b> | actin      | <b>D 26</b>   | C-ter.          | C                            | 35.4               |  |

\* , cross-links shown on Fig 3; N-ter., region flanking Ig1Ig2 N-terminally; C-ter., region flanking Ig1Ig2 C-terminally; Score, computed as  $-10 \log_{10}$  (E-value) representing best identification for a crosslink pair. The higher values of the score indicate more reliable identifications.
