# Supplementary material for: Molecular basis of F-actin regulation and sarcomere assembly via myotilin
Source: PubMed Central journal article supplement (PMC8062120; doi:10.1371/journal.pbio.3001148), 2021-04-12
Supplement: pbio.3001148.s009.pdf [file pbio.3001148.s009.pdf]

**S3 Table. List of constructs**

| Name                                      | <sup>(1)</sup> Protein | Residues  | Mutations           | Vector     | <sup>(2)</sup> Tag                 | Expression in  | Origin     |
|-------------------------------------------|------------------------|-----------|---------------------|------------|------------------------------------|----------------|------------|
| Trx-MYOT                                  | myotilin               | 1-498     | -                   | pETM-20    | N-Trx-His <sub>6</sub> -TEV        | <i>E. coli</i> | this study |
| Trx-MYOT-NEECK                            | myotilin               | 1-498     | F96E, L97E, L101E   | pETM-20    | N-Trx-His <sub>6</sub> -TEV        | <i>E. coli</i> | this study |
| Ig1Ig2 <sup>185-498</sup>                 | myotilin               | 185-498   | -                   | pETM-20    | N-Trx-His <sub>6</sub> -3C C-Strep | <i>E. coli</i> | this study |
| <sup>(3)</sup> Ig1Ig2 <sup>185-498*</sup> | myotilin               | 185-498   | -                   | pDB-HisGST | N-His <sub>6</sub> -GST-TEV        | <i>E. coli</i> | this study |
| Ig1Ig2 <sup>220-452</sup>                 | myotilin               | 220-452   | -                   | pETM-14    | N-His <sub>6</sub> -3C             | <i>E. coli</i> | this study |
| Ig1Ig2 <sup>220-452 R405K</sup>           | myotilin               | 220-452   | R405K               | pETM-14    | N-His <sub>6</sub> -3C             | <i>E. coli</i> | this study |
| <sup>(4)</sup> Ig1Ig2 <sup>250-498</sup>  | myotilin               | 250-498   | -                   | pETM-14    | N-His <sub>6</sub> -3C             | <i>E. coli</i> | this study |
| Ig1Ig2 <sup>250-444</sup>                 | myotilin               | 250-444   | -                   | pETM-14    | N-His <sub>6</sub> -3C             | <i>E. coli</i> | [22]       |
| Ig1Ig2 <sup>K354A</sup>                   | myotilin               | 250-444   | K354A               | pETM-14    | N-His <sub>6</sub> -3C             | <i>E. coli</i> | this study |
| Ig1Ig2 <sup>Q356A</sup>                   | myotilin               | 250-444   | Q356A               | pETM-14    | N-His <sub>6</sub> -3C             | <i>E. coli</i> | this study |
| Ig1Ig2 <sup>K358A</sup>                   | myotilin               | 250-444   | K358A               | pETM-14    | N-His <sub>6</sub> -3C             | <i>E. coli</i> | this study |
| Ig1Ig2 <sup>K359A</sup>                   | myotilin               | 250-444   | K359A               | pETM-14    | N-His <sub>6</sub> -3C             | <i>E. coli</i> | this study |
| Ig1Ig2 <sup>K367A</sup>                   | myotilin               | 250-444   | K367A               | pETM-14    | N-His <sub>6</sub> -3C             | <i>E. coli</i> | this study |
| Ig1Ig2 <sup>R405K</sup>                   | myotilin               | 250-444   | R405K               | pETM-14    | N-His <sub>6</sub> -3C             | <i>E. coli</i> | this study |
| Ig1Ig2 <sup>K411A</sup>                   | myotilin               | 250-444   | K411A               | pETM-14    | N-His <sub>6</sub> -3C             | <i>E. coli</i> | this study |
| Ig1Ig2 <sup>K354/359A</sup>               | myotilin               | 250-444   | K354A, K359A        | pETM-14    | N-His <sub>6</sub> -3C             | <i>E. coli</i> | this study |
| Ig1Ig2 <sup>K354/358/359A</sup>           | myotilin               | 250-444   | K354A, K358A, K359A | pETM-14    | N-His <sub>6</sub> -3C             | <i>E. coli</i> | this study |
| Ig1 <sup>250-344</sup>                    | myotilin               | 250-344   | -                   | pET-3d(+)  | N-His <sub>6</sub> -TEV            | <i>E. coli</i> | this study |
| Ig2 <sup>349-459</sup>                    | myotilin               | 349-459   | -                   | pET-3d(+)  | N-His <sub>6</sub> -TEV            | <i>E. coli</i> | this study |
| MYOT <sup>WT</sup>                        | myotilin               | 1-498     | -                   | pEGFP-N1   | N-EGFP                             | C2C12          | this study |
| MYOT <sup>K354A</sup>                     | myotilin               | 1-498     | K354A               | pEGFP-N1   | N-EGFP                             | C2C12          | this study |
| MYOT <sup>K359A</sup>                     | myotilin               | 1-498     | K359A               | pEGFP-N1   | N-EGFP                             | C2C12          | this study |
| MYOT <sup>K354/359A</sup>                 | myotilin               | 1-498     | K354A, K359A        | pEGFP-N1   | N-EGFP                             | C2C12          | this study |
| MYOT <sup>K354/358/359A</sup>             | myotilin               | 1-498     | K354A, K358A, K359A | pEGFP-N1   | N-EGFP                             | C2C12          | this study |
| ACTN2-WT                                  | α-actinin-2            | 1-894     | -                   | pET-3d(+)  | N-His <sub>6</sub> -TEV            | <i>E. coli</i> | [7]        |
| ACTN2-NEECK                               | α-actinin-2            | 1-894     | R268E, I269E, L273E | pET-3d(+)  | N-His <sub>6</sub> -TEV            | <i>E. coli</i> | [7]        |
| ACTN2-EF14                                | α-actinin-2            | 746-894   | -                   | pETM-14    | N-His <sub>6</sub> -3C             | <i>E. coli</i> | this study |
| palladin Ig3                              | palladin               | 1022-1126 | -                   | pTBSG      | N-His <sub>6</sub> -TEV            | <i>E. coli</i> | [46]       |
| Doc2b                                     | Doc2b                  | 125-412   | -                   | pGEX4T1    | N-GST-Thr                          | <i>E. coli</i> | [47]       |
| DVD-actin                                 | actin-5C               | 1-376     | D287A, V288A, D289A | pFastBacHT | N-His <sub>6</sub>                 | <i>Sf9</i>     | [30]       |
| tropomyosin                               | tropomyosin            |           |                     |            |                                    | <i>E. coli</i> | [33]       |

(1), myotilin (human, Uniprot-ID Q9UBF9); α-actinin-2 (human, P35609), palladin (Mus musculus, Q9ET54), Doc2b (Rattus norvegicus, P70610), actin-5C (Drosophila melanogaster, P10987), tropomyosin (Tpm1.1st, Homo sapiens, NP\_001018005.1)

(2), in many cases removed during purification; N, N-terminal fusion; Trx, Thioredoxin-tag; His<sub>6</sub>, 6xHis-tag, TEV; TEV protease cleavage site; 3C, HRV-3C protease cleavage site; C, C-terminal fusion; Strep, Strep-tag II; Thr, thrombin cleavage site, GST, Glutathione s-transferase-tag; EGFP, Enhanced green fluorescent protein-tag

(3), Ig1Ig2<sup>185-498\*</sup> was used to produce Ig1Ig2<sup>185-454</sup>, and GST

(4), Ig1Ig2<sup>250-498</sup> was used to produce Ig1Ig2<sup>250-466</sup>
